# Supplementary material
Source: PubMed Central journal article supplement (PMC6667288)
Supplement: NIHMS1523213-supplement-1.pdf [file NIHMS1523213-supplement-1.pdf]

**Supplemental Table 1. Information of selected SNPs in GATA3**

| SNP        | Chr | Position | A1 | A2 | P for HWE | MAF_High risk<br>by flow | MAF_Low risk by<br>flow | MAF_Initially low<br>risk | MAF in 1k<br>genome_EUR |
|------------|-----|----------|----|----|-----------|--------------------------|-------------------------|---------------------------|-------------------------|
| rs1244186  | 10  | 8092683  | A  | G  | 0.82      | 0.25                     | 0.22                    | 0.24                      | 0.23                    |
| rs2275806  | 10  | 8095340  | G  | A  | 0.16      | 0.47                     | 0.43                    | 0.43                      | 0.45                    |
| rs369421   | 10  | 8099177  | G  | A  | 0.37      | 0.18                     | 0.15                    | 0.16                      | 0.17                    |
| rs2229359  | 10  | 8100647  | A  | G  | 0.67      | 0.07                     | 0.07                    | 0.07                      | 0.07                    |
| rs3781093  | 10  | 8101927  | G  | A  | 0.04      | 0.16                     | 0.16                    | 0.15                      | 0.18                    |
| rs3802604  | 10  | 8102272  | G  | A  | 0.07      | 0.39                     | 0.37                    | 0.36                      | 0.38                    |
| rs3824662  | 10  | 8104208  | A  | C  | 0.14      | 0.17                     | 0.19                    | 0.17                      | 0.19                    |
| rs568727   | 10  | 8106701  | A  | C  | 0.33      | 0.40                     | 0.37                    | 0.36                      | 0.38                    |
| rs3802600  | 10  | 8108812  | A  | T  | 0.66      | 0.19                     | 0.19                    | 0.19                      | 0.21                    |
| rs528778   | 10  | 8112143  | A  | G  | 0.45      | 0.23                     | 0.19                    | 0.18                      | 0.19                    |
| rs10905284 | 10  | 8115362  | C  | A  | 0.48      | 0.47                     | 0.44                    | 0.43                      | 0.43                    |
| rs434645   | 10  | 8121451  | A  | G  | 0.47      | 0.17                     | 0.16                    | 0.14                      | 0.14                    |

Supplemental Table 2. GATA3 SNPs and overall survival

| Genotype        | Treated Group (n=441) |                           |                     |                         |                   | Untreated Group (n=799) |                           |                     |                         |                   |
|-----------------|-----------------------|---------------------------|---------------------|-------------------------|-------------------|-------------------------|---------------------------|---------------------|-------------------------|-------------------|
|                 | # events/<br>patients | Unadjusted HR<br>(95% CI) | Unadjusted <i>P</i> | Adjusted HR<br>(95% CI) | Adjusted <i>P</i> | # events/<br>patients   | Unadjusted HR<br>(95% CI) | Unadjusted <i>P</i> | Adjusted HR<br>(95% CI) | Adjusted <i>P</i> |
| rs1244186       |                       |                           |                     |                         |                   |                         |                           |                     |                         |                   |
| GG              | 60/252                | 1.00                      |                     | 1.00                    |                   | 140/467                 | 1.00                      |                     | 1.00                    |                   |
| AG              | 43/158                | 1.19 (0.80-1.77)          | 0.38                | 1.30 (0.87-1.93)        | 0.2               | 70/284                  | 0.81 (0.61-1.08)          | 0.15                | 0.82 (0.62-1.10)        | 0.18              |
| AA              | 9/31                  | 1.26 (0.63-2.55)          | 0.51                | 1.39 (0.69-2.83)        | 0.36              | 12/44                   | 0.93 (0.55-1.77)          | 0.95                | 1.01 (0.56-1.83)        | 0.96              |
| Per risk allele |                       | 1.15 (0.86-1.53)          | 0.36                | 1.22 (0.92-1.63)        | 0.18              |                         | 0.89 (0.70-1.11)          | 0.3                 | 0.90 (0.71-1.13)        | 0.36              |
| rs2275806       |                       |                           |                     |                         |                   |                         |                           |                     |                         |                   |
| AA              | 31/134                | 1.00                      |                     | 1.00                    |                   | 82/258                  | 1.00                      |                     | 1.00                    |                   |
| GA              | 41/200                | 0.89 (0.55-1.42)          | 0.61                | 1.01 (0.63-1.62)        | 0.98              | 103/384                 | 0.86 (0.64-1.15)          | 0.3                 | 0.92 (0.69-1.23)        | 0.56              |
| GG              | 39/105                | 1.72 (1.07-2.76)          | 0.03                | 1.83 (1.14-2.96)        | 0.01              | 36/152                  | 0.74 (0.50-1.10)          | 0.14                | 0.71 (0.48-1.05)        | 0.09              |
| Per risk allele |                       | 1.33 (1.03-1.71)          | 0.03                | 1.36 (1.06-1.75)        | 0.02              |                         | 0.86 (0.71-1.04)          | 0.11                | 0.85 (0.71-1.03)        | 0.09              |
| rs369421        |                       |                           |                     |                         |                   |                         |                           |                     |                         |                   |
| AA              | 71/301                | 1.00                      |                     | 1.00                    |                   | 162/571                 | 1.00                      |                     | 1.00                    |                   |
| GA              | 36/125                | 1.29 (0.86-1.93)          | 0.22                | 1.37 (0.92-2.06)        | 0.12              | 53/202                  | 0.95 (0.70-1.30)          | 0.76                | 0.89 (0.65-1.22)        | 0.46              |
| GG              | 5/15                  | 1.42 (0.57-3.53)          | 0.45                | 1.51 (0.61-3.74)        | 0.38              | 6/23                    | 0.97 (0.43-2.20)          | 0.95                | 1.29 (0.57-2.92)        | 0.55              |
| Per risk allele |                       | 1.24 (0.90-1.70)          | 0.19                | 1.30 (0.94-1.78)        | 0.11              |                         | 0.97 (0.75-1.25)          | 0.79                | 0.96 (0.74-1.25)        | 0.77              |
| rs2229359       |                       |                           |                     |                         |                   |                         |                           |                     |                         |                   |
| GG              | 89/378                | 1.00                      |                     | 1.00                    |                   | 191/687                 | 1.00                      |                     | 1.00                    |                   |
| AG              | 23/59                 | 1.70 (1.08-2.70)          | 0.02                | 1.85 (1.16-2.93)        | 0.009             | 30/103                  | 1.07 (0.73-1.57)          | 0.75                | 1.05 (0.72-1.55)        | 0.79              |
| AA              | 0/2                   |                           | 0.99                |                         | 0.99              | 1/3                     | 1.45 (0.20-10.38)         | 0.71                | 1.22 (0.17-8.71)        | 0.84              |
| Per risk allele |                       | 1.50 (0.97-2.31)          | 0.07                | 1.66 (1.07-2.59)        | 0.02              |                         | 1.09 (0.76-1.57)          | 0.64                | 1.06 (0.74-1.53)        | 0.74              |
| rs3781093       |                       |                           |                     |                         |                   |                         |                           |                     |                         |                   |
| AA              | 70/303                | 1.00                      |                     | 1.00                    |                   | 161/564                 | 1.00                      |                     | 1.00                    |                   |
| GA              | 38/131                | 1.30 (0.87-1.93)          | 0.2                 | 1.23 (0.82-1.84)        | 0.31              | 56/216                  | 0.92 (0.68-1.25)          | 0.59                | 0.92 (0.68-1.24)        | 0.58              |
| GG              | 4/7                   | 2.50 (0.91-6.87)          | 0.07                | 2.31 (0.83-6.43)        | 0.11              | 4/14                    | 0.95 (0.35-2.56)          | 0.92                | 0.79 (0.29-2.13)        | 0.64              |
| Per risk allele |                       | 1.38 (0.98-1.93)          | 0.07                | 1.30 (0.92-1.84)        | 0.13              |                         | 0.93 (0.71-1.22)          | 0.6                 | 0.91 (0.69-1.19)        | 0.47              |

|                 |        |                  |               |                  |               |         |                  |      |                  |      |
|-----------------|--------|------------------|---------------|------------------|---------------|---------|------------------|------|------------------|------|
| rs3802604       |        |                  |               |                  |               |         |                  |      |                  |      |
| AA              | 31/164 | 1.00             |               | 1.00             |               | 96/337  | 1.00             |      | 1.00             |      |
| GA              | 51/206 | 1.30 (0.83-2.04) | 0.25          | 1.36 (0.87-2.14) | 0.18          | 99/342  | 1.04 (0.79-1.38) | 0.77 | 1.07 (0.81-1.42) | 0.64 |
| GG              | 30/70  | 2.40 (1.45-3.97) | <b>0.0006</b> | 2.45 (1.48-4.05) | <b>0.0005</b> | 27/166  | 0.82 (0.54-1.26) | 0.37 | 0.78 (0.51-1.20) | 0.27 |
| Per risk allele |        | 1.55 (1.20-2.02) | <b>0.0009</b> | 1.57 (1.21-2.03) | <b>0.0007</b> |         | 0.95 (0.78-1.14) | 0.56 | 0.94 (0.78-1.13) | 0.48 |
| rs3824662       |        |                  |               |                  |               |         |                  |      |                  |      |
| CC              | 67/294 | 1.00             |               | 1.00             |               | 154/536 | 1.00             |      | 1.00             |      |
| AC              | 39/134 | 1.36 (0.92-2.02) | 0.13          | 1.28 (0.85-1.91) | 0.23          | 62/243  | 0.90 (0.67-1.20) | 0.46 | 0.89 (0.66-1.20) | 0.44 |
| AA              | 6/13   | 2.29 (0.99-5.28) | 0.05          | 2.10 (0.90-4.93) | 0.09          | 6/18    | 1.27 (0.56-2.87) | 0.57 | 1.18 (0.52-2.67) | 0.69 |
| Per risk allele |        | 1.42 (1.03-1.95) | 0.03          | 1.34 (0.97-1.85) | 0.08          |         | 0.95 (0.74-1.23) | 0.71 | 0.94 (0.73-1.22) | 0.64 |
| rs568727        |        |                  |               |                  |               |         |                  |      |                  |      |
| CC              | 28/160 | 1.00             |               | 1.00             |               | 95/328  | 1.00             |      | 1.00             |      |
| AC              | 52/204 | 1.62 (1.02-2.58) | 0.04          | 1.50 (0.94-2.39) | 0.09          | 102/357 | 1.03 (0.78-1.37) | 0.82 | 1.03 (0.78-1.36) | 0.86 |
| AA              | 32/77  | 2.75 (1.65-4.59) | <b>0.0001</b> | 2.57 (1.43-4.30) | <b>0.0003</b> | 24/111  | 0.76 (0.49-1.19) | 0.23 | 0.74 (0.47-1.16) | 0.19 |
| Per risk allele |        | 1.64 (1.27-2.12) | <b>0.0001</b> | 1.59 (1.23-2.06) | <b>0.0005</b> |         | 0.92 (0.76-1.11) | 0.39 | 0.91 (0.75-1.10) | 0.32 |
| rs3802600       |        |                  |               |                  |               |         |                  |      |                  |      |
| TT              | 64/283 | 1.00             |               | 1.00             |               | 153/523 | 1.00             |      | 1.00             |      |
| AT              | 41/139 | 1.39 (0.94-2.05) | 0.1           | 1.24 (0.83-1.86) | 0.29          | 63/247  | 0.86 (0.64-1.15) | 0.31 | 0.84 (0.62-1.12) | 0.24 |
| AA              | 6/17   | 1.70 (0.74-3.94) | 0.21          | 1.67 (0.71-3.95) | 0.24          | 5/25    | 0.68 (0.28-1.67) | 0.4  | 0.72 (0.29-1.75) | 0.47 |
| Per risk allele |        | 1.34 (0.98-1.82) | 0.06          | 1.26 (0.92-1.73) | 0.16          |         | 0.85 (0.66-1.09) | 0.2  | 0.84 (0.65-1.08) | 0.17 |
| rs528778        |        |                  |               |                  |               |         |                  |      |                  |      |
| GG              | 60/271 | 1.00             |               | 1.00             |               | 142/527 | 1.00             |      | 1.00             |      |
| AG              | 44/145 | 1.49 (1.01-2.21) | 0.04          | 1.51 (1.02-2.23) | 0.04          | 70/244  | 1.09 (0.82-1.45) | 0.56 | 1.02 (0.77-1.36) | 0.88 |
| AA              | 8/25   | 1.40 (0.67-2.94) | 0.37          | 1.46 (0.70-3.07) | 0.31          | 10/26   | 1.54 (0.81-2.92) | 0.19 | 1.88 (0.99-3.57) | 0.05 |
| Per risk allele |        | 1.30 (0.98-1.73) | 0.07          | 1.32 (0.99-1.76) | 0.06          |         | 1.15 (0.91-1.45) | 0.24 | 1.14 (0.90-1.45) | 0.28 |
| rs10905284      |        |                  |               |                  |               |         |                  |      |                  |      |
| AA              | 25/126 | 1.00             |               | 1.00             |               | 62/261  | 1.00             |      | 1.00             |      |
| CA              | 51/219 | 1.28 (0.79-2.08) | 0.32          | 1.27 (0.78-2.07) | 0.33          | 123/381 | 1.48 (1.09-2.01) | 0.01 | 1.44 (1.06-1.96) | 0.02 |
| CC              | 36/95  | 2.02 (1.21-3.39) | 0.008         | 2.01 (1.20-3.38) | 0.008         | 37/154  | 1.03 (0.68-1.54) | 0.9  | 0.99 (0.66-1.48) | 0.95 |

|                 |        |                  |       |                  |       |         |                  |      |                  |       |
|-----------------|--------|------------------|-------|------------------|-------|---------|------------------|------|------------------|-------|
| Per risk allele |        | 1.42 (1.09-1.84) | 0.008 | 1.42 (1.09-1.84) | 0.009 |         | 1.06 (0.88-1.27) | 0.55 | 1.04 (0.86-1.24) | 0.71  |
| rs434645        |        |                  |       |                  |       |         |                  |      |                  |       |
| GG              | 70/311 | 1.00             |       | 1.00             |       | 155/575 | 1.00             |      | 1.00             |       |
| AG              | 35/113 | 1.49 (0.99-2.24) | 0.05  | 1.60 (1.06-2.41) | 0.02  | 60/208  | 1.03 (0.77-1.39) | 0.83 | 0.94 (0.70-1.27) | 0.68  |
| AA              | 7/17   | 1.85 (0.85-4.02) | 0.12  | 1.94 (0.89-4.23) | 0.1   | 7/14    | 2.16 (1.01-4.60) | 0.05 | 2.81 (1.31-6.02) | 0.008 |
| Per risk allele |        | 1.41 (1.05-1.90) | 0.02  | 1.48 (1.09-1.99) | 0.01  |         | 1.15 (0.89-1.49) | 0.28 | 1.10 (0.84-1.43) | 0.49  |

Supplemental Table 3. GATA3 SNPs and disease-free survival

| Genotype        | Treated Group (n=441) |                           |                     |                         |                   | Untreated Group (n=799) |                           |                     |                         |                   |
|-----------------|-----------------------|---------------------------|---------------------|-------------------------|-------------------|-------------------------|---------------------------|---------------------|-------------------------|-------------------|
|                 | # events/<br>patients | Unadjusted HR<br>(95% CI) | Unadjusted <i>P</i> | Adjusted HR<br>(95% CI) | Adjusted <i>P</i> | # events/<br>patients   | Unadjusted HR<br>(95% CI) | Unadjusted <i>P</i> | Adjusted HR<br>(95% CI) | Adjusted <i>P</i> |
| rs1244186       |                       |                           |                     |                         |                   |                         |                           |                     |                         |                   |
| GG              | 84/252                | 1.00                      |                     | 1.00                    |                   | 197/467                 | 1.00                      |                     | 1.00                    |                   |
| AG              | 55/58                 | 1.09 (0.78-1.54)          | 0.61                | 1.17 (0.83-1.64)        | 0.38              | 105/284                 | 0.86 (0.68-1.09)          | 0.22                | 0.89 (0.70-1.13)        | 0.33              |
| AA              | 13/31                 | 1.27 (0.71-2.28)          | 0.42                | 1.34 (0.75-2.42)        | 0.33              | 14/44                   | 0.77 (0.45-1.33)          | 0.35                | 0.82 (0.48-1.42)        | 0.48              |
| Per risk allele |                       | 1.11 (0.87-1.42)          | 0.41                | 1.16 (0.91-1.48)        | 0.24              |                         | 0.87 (0.72-1.05)          | 0.15                | 0.90 (0.74-1.09)        | 0.26              |
| rs2275806       |                       |                           |                     |                         |                   |                         |                           |                     |                         |                   |
| AA              | 43/134                | 1.00                      |                     | 1.00                    |                   | 108/258                 | 1.00                      |                     | 1.00                    |                   |
| GA              | 59/200                | 0.92 (0.62-1.36)          | 0.67                | 0.99 (0.67-1.48)        | 0.98              | 157/384                 | 1.01 (0.79-1.29)          | 0.95                | 1.06 (0.83-1.36)        | 0.63              |
| GG              | 49/105                | 1.59 (1.05-2.40)          | 0.03                | 1.67 (1.10-2.53)        | 0.02              | 51/152                  | 0.80 (0.57-1.11)          | 0.18                | 0.80 (0.57-1.11)        | 0.18              |
| Per risk allele |                       | 1.27 (1.02-1.58)          | 0.03                | 1.30 (1.04-1.61)        | 0.02              |                         | 0.91 (0.78-1.06)          | 0.24                | 0.92 (0.79-1.07)        | 0.28              |
| rs369421        |                       |                           |                     |                         |                   |                         |                           |                     |                         |                   |
| AA              | 98/301                | 1.00                      |                     | 1.00                    |                   | 233/571                 | 1.00                      |                     | 1.00                    |                   |
| GA              | 47/125                | 1.23 (0.86-1.74)          | 0.25                | 1.27 (0.89-1.80)        | 0.18              | 76/202                  | 0.95 (0.73-1.23)          | 0.7                 | 0.94 (0.72-1.22)        | 0.63              |
| GG              | 7/15                  | 1.41 (0.65-3.04)          | 0.38                | 1.42 (0.66-3.05)        | 0.38              | 6/23                    | 0.73 (0.35-1.56)          | 0.42                | 0.83 (0.39-1.77)        | 0.64              |
| Per risk allele |                       | 1.21 (0.92-1.99)          | 0.18                | 1.23 (0.93-1.62)        | 0.14              |                         | 0.92 (0.74-1.15)          | 0.46                | 0.93 (0.75-1.16)        | 0.53              |
| rs2229359       |                       |                           |                     |                         |                   |                         |                           |                     |                         |                   |
| GG              | 124/378               | 1.00                      |                     | 1.00                    |                   | 276/687                 | 1.00                      |                     | 1.00                    |                   |
| AG              | 28/59                 | 1.54 (1.02-2.31)          | 0.04                | 1.59 (1.05-2.40)        | 0.03              | 40/103                  | 0.99 (0.71-1.38)          | 0.94                | 1.01 (0.73-1.41)        | 0.95              |
| AA              | 0/2                   | -                         | 0.99                | -                       | 0.99              | 1/3                     | 0.87 (0.12-6.17)          | 0.89                | 0.74 (0.10-5.31)        | 0.77              |
| Per risk allele |                       | 1.35 (0.92-1.99)          | 0.12                | 1.42 (0.96-2.11)        | 0.08              |                         | 0.99 (0.72-1.36)          | 0.96                | 1.00 (0.73-1.37)        | 0.99              |
| rs3781093       |                       |                           |                     |                         |                   |                         |                           |                     |                         |                   |
| AA              | 99/303                | 1.00                      |                     | 1.00                    |                   | 226/564                 | 1.00                      |                     | 1.00                    |                   |
| GA              | 49/131                | 1.21 (0.86-1.71)          | 0.27                | 1.18 (0.83-1.66)        | 0.36              | 85/216                  | 1.00 (0.78-1.28)          | 0.99                | 0.99 (0.77-1.27)        | 0.93              |
| GG              | 4/7                   | 1.86 (0.69-5.07)          | 0.22                | 1.77 (0.64-4.90)        | 0.27              | 4/14                    | 0.61 (0.23-1.63)          | 0.32                | 0.56 (0.21-1.50)        | 0.25              |
| Per risk allele |                       | 1.25 (0.93-1.69)          | 0.15                | 1.21 (0.89-1.64)        | 0.22              |                         | 0.94 (0.75-1.18)          | 0.59                | 0.92 (0.74-1.15)        | 0.49              |

|                 |        |                  |               |                  |              |         |                  |      |                  |      |
|-----------------|--------|------------------|---------------|------------------|--------------|---------|------------------|------|------------------|------|
| rs3802604       |        |                  |               |                  |              |         |                  |      |                  |      |
| AA              | 49/164 | 1.00             |               | 1.00             |              | 134/337 | 1.00             |      | 1.00             |      |
| GA              | 66/206 | 1.05 (0.72-1.52) | 0.8           | 1.08 (0.74-1.56) | 0.69         | 145/342 | 1.12 (0.89-1.42) | 0.33 | 1.15 (0.91-1.45) | 0.25 |
| GG              | 37/70  | 1.96 (1.28-3.00) | 0.002         | 1.95 (1.27-2.99) | 0.002        | 38/116  | 0.82 (0.57-1.17) | 0.27 | 0.80 (0.56-1.15) | 0.24 |
| Per risk allele |        | 1.38 (1.10-1.73) | 0.006         | 1.38 (1.10-1.73) | 0.005        |         | 0.96 (0.82-1.13) | 0.63 | 0.96 (0.82-1.12) | 0.62 |
| rs3824662       |        |                  |               |                  |              |         |                  |      |                  |      |
| CC              | 94/294 | 1.00             |               | 1.00             |              | 216/536 | 1.00             |      | 1.00             |      |
| AC              | 51/134 | 1.28 (0.91-1.80) | 0.16          | 1.22 (0.87-1.73) | 0.25         | 95/243  | 0.98 (0.77-1.24) | 0.84 | 0.96 (0.75-1.22) | 0.71 |
| AA              | 7/13   | 1.93 (0.89-4.15) | 0.09          | 1.87 (0.86-4.09) | 0.12         | 6/18    | 0.81 (0.36-1.83) | 0.61 | 0.79 (0.35-1.79) | 0.58 |
| Per risk allele |        | 1.32 (1.00-1.74) | 0.05          | 1.28 (0.96-1.69) | 0.09         |         | 0.95 (0.77-1.18) | 0.65 | 0.93 (0.75-1.16) | 0.54 |
| rs568727        |        |                  |               |                  |              |         |                  |      |                  |      |
| CC              | 45/160 | 1.00             |               | 1.00             |              | 131/328 | 1.00             |      | 1.00             |      |
| AC              | 68/204 | 1.29 (0.88-1.88) | 0.19          | 1.22 (0.83-1.79) | 0.31         | 153/357 | 1.15 (0.91-1.45) | 0.25 | 1.14 (0.90-1.44) | 0.28 |
| AA              | 39/77  | 2.12 (1.38-3.27) | <b>0.0006</b> | 2.02 (1.31-3.12) | <b>0.001</b> | 32/111  | 0.72 (0.49-1.05) | 0.09 | 0.71 (0.48-1.04) | 0.08 |
| Per risk allele |        | 1.45 (1.16-1.80) | <b>0.001</b>  | 1.41 (1.13-1.76) | <b>0.003</b> |         | 0.93 (0.79-1.09) | 0.37 | 0.92 (0.79-1.08) | 0.33 |
| rs3802600       |        |                  |               |                  |              |         |                  |      |                  |      |
| TT              | 89/283 | 1.00             |               | 1.00             |              | 209/523 | 1.00             |      | 1.00             |      |
| AT              | 55/139 | 1.37 (0.97-1.91) | 0.07          | 1.29 (0.92-1.82) | 0.15         | 101/247 | 1.03 (0.81-1.30) | 0.83 | 1.00 (0.78-1.26) | 0.97 |
| AA              | 7/17   | 1.44 (0.67-3.11) | 0.35          | 1.43 (0.65-3.16) | 0.37         | 6/25    | 0.58 (0.26-1.30) | 0.18 | 0.59 (0.26-1.32) | 0.2  |
| Per risk allele |        | 1.29 (0.98-1.68) | 0.07          | 1.25 (0.95-1.64) | 0.11         |         | 0.94 (0.76-1.15) | 0.54 | 0.92 (0.75-1.13) | 0.44 |
| rs528778        |        |                  |               |                  |              |         |                  |      |                  |      |
| GG              | 90/271 | 1.00             |               | 1.00             |              | 210/527 | 1.00             |      | 1.00             |      |
| AG              | 52/145 | 1.14 (0.81-1.61) | 0.44          | 1.15 (0.82-1.62) | 0.43         | 96/244  | 1.02 (0.80-1.29) | 0.9  | 1.00 (0.79-1.27) | 0.99 |
| AA              | 10/25  | 1.15 (0.60-2.21) | 0.68          | 1.15 (0.60-2.21) | 0.68         | 11/26   | 1.06 (0.58-1.94) | 0.85 | 1.16 (0.63-2.12) | 0.64 |
| Per risk allele |        | 1.10 (0.85-1.42) | 0.46          | 1.11 (0.86-1.43) | 0.44         |         | 1.02 (0.84-1.25) | 0.83 | 1.03 (0.84-1.26) | 0.8  |
| rs10905284      |        |                  |               |                  |              |         |                  |      |                  |      |
| AA              | 37/126 | 1.00             |               | 1.00             |              | 93/261  | 1.00             |      | 1.00             |      |
| CA              | 71/219 | 1.18 (0.79-1.76) | 0.43          | 1.17 (0.79-1.76) | 0.43         | 168/381 | 1.36 (1.06-1.75) | 0.02 | 1.33 (1.03-1.72) | 0.03 |
| CC              | 44/95  | 1.70 (1.09-2.64) | 0.02          | 1.68 (1.08-2.61) | 0.02         | 56/154  | 1.06 (0.76-1.48) | 0.72 | 1.03 (0.74-1.43) | 0.87 |

|                 |         |                  |      |                  |      |         |                  |      |                  |      |
|-----------------|---------|------------------|------|------------------|------|---------|------------------|------|------------------|------|
| Per risk allele |         | 1.30 (1.04-1.63) | 0.02 | 1.30 (1.04-1.62) | 0.02 |         | 1.06 (0.91-1.24) | 0.44 | 1.04 (0.90-1.22) | 0.58 |
| rs434645        |         |                  |      |                  |      |         |                  |      |                  |      |
| GG              | 101/311 | 1.00             |      | 1.00             |      | 224/575 | 1.00             |      | 1.00             |      |
| AG              | 43/113  | 1.25 (0.88-1.79) | 0.22 | 1.31 (0.91-1.88) | 0.14 | 85/208  | 1.06 (0.82-1.36) | 0.66 | 1.02 (0.80-1.31) | 0.87 |
| AA              | 8/17    | 1.51 (0.73-3.09) | 0.27 | 1.50 (0.73-3.09) | 0.27 | 8/14    | 1.75 (0.86-3.54) | 0.12 | 1.96 (0.97-3.98) | 0.06 |
| Per risk allele |         | 1.24 (0.94-1.62) | 0.12 | 1.27 (0.97-1.66) | 0.09 |         | 1.13 (0.91-1.40) | 0.28 | 1.11 (0.89-1.39) | 0.35 |

Supplemental Table 4. GATA3 SNPs and overall survival in the treated group by tamoxifen therapy

| Genotype        | Tamoxifen Treated Group (n=220) |                           |                     |                         |                   | No Tamoxifen Treated Group (n=221) |                           |                     |                         |                   |
|-----------------|---------------------------------|---------------------------|---------------------|-------------------------|-------------------|------------------------------------|---------------------------|---------------------|-------------------------|-------------------|
|                 | # events/<br>patients           | Unadjusted HR<br>(95% CI) | Unadjusted <i>P</i> | Adjusted HR<br>(95% CI) | Adjusted <i>P</i> | # events/<br>patients              | Unadjusted HR<br>(95% CI) | Unadjusted <i>P</i> | Adjusted HR<br>(95% CI) | Adjusted <i>P</i> |
| rs1244186       |                                 |                           |                     |                         |                   |                                    |                           |                     |                         |                   |
| GG              | 22/121                          | 1.00                      |                     | 1.00                    |                   | 37/129                             | 1.00                      |                     | 1.00                    |                   |
| AG              | 20/81                           | 1.34 (0.73-2.45)          | 0.35                | 1.46 (0.79-2.68)        | 0.23              | 23/77                              | 1.12 (0.67-1.89)          | 0.67                | 1.18 (0.70-2.00)        | 0.53              |
| AA              | 8/16                            | 3.00 (1.33-6.75)          | 0.008               | 2.73 (1.19-6.27)        | 0.02              | 1/15                               | 0.23 (0.03-1.66)          | 0.14                | 0.31 (0.04-2.27)        | 0.25              |
| Per risk allele |                                 | 1.60 (1.07-2.39)          | 0.02                | 1.58 (1.06-2.36)        | 0.02              |                                    | 0.84 (0.55-1.29)          | 0.43                | 0.93 (0.60-1.45)        | 0.76              |
| rs2275806       |                                 |                           |                     |                         |                   |                                    |                           |                     |                         |                   |
| AA              | 13/59                           | 1.00                      |                     | 1.00                    |                   | 17/73                              | 1.00                      |                     | 1.00                    |                   |
| GA              | 16/104                          | 0.66 (0.32-1.38)          | 0.27                | 0.78 (0.37-1.66)        | 0.53              | 25/96                              | 1.14 (0.61-2.11)          | 0.68                | 1.16 (0.62-2.15)        | 0.64              |
| GG              | 20/54                           | 1.64 (0.81-3.29)          | 0.17                | 1.70 (0.84-3.41)        | 0.14              | 19/51                              | 1.79 (0.93-3.44)          | 0.08                | 1.88 (0.98-3.63)        | 0.06              |
| Per risk allele |                                 | 1.33 (0.90-1.96)          | 0.15                | 1.33 (0.91-1.93)        | 0.14              |                                    | 1.34 (0.96-1.88)          | 0.09                | 1.38 (0.98-1.94)        | 0.07              |
| rs369421        |                                 |                           |                     |                         |                   |                                    |                           |                     |                         |                   |
| AA              | 27/146                          | 1.00                      |                     | 1.00                    |                   | 43/153                             | 1.00                      |                     | 1.00                    |                   |
| GA              | 18/66                           | 1.54 (0.85-2.80)          | 0.16                | 1.70 (0.93-3.10)        | 0.09              | 18/59                              | 1.16 (0.67-2.01)          | 0.6                 | 1.15 (0.66-2.00)        | 0.62              |
| GG              | 5/6                             | 7.01 (2.66-18.47)         | <b>8.20E-05</b>     | 4.82 (1.76-13.18)       | 0.002             | 0/9                                | -                         | 0.99                | -                       | 0.99              |
| Per risk allele |                                 | 2.03 (1.28-3.23)          | 0.003               | 1.94 (1.25-3.02)        | 0.003             |                                    | 0.83 (0.52-1.34)          | 0.45                | 0.90 (0.55-1.47)        | 0.68              |
| rs2229359       |                                 |                           |                     |                         |                   |                                    |                           |                     |                         |                   |
| GG              | 37/186                          | 1.00                      |                     | 1.00                    |                   | 51/190                             | 1.00                      |                     | 1.00                    |                   |
| AG              | 13/31                           | 2.31 (1.23-4.35)          | 0.01                | 2.49 (1.31-4.72)        | 0.005             | 10/28                              | 1.30 (0.66-2.57)          | 0.44                | 1.42 (0.72-2.80)        | 0.31              |
| AA              | 0/1                             | -                         | 0.99                | -                       | 0.99              | 0/1                                | -                         | 0.99                | -                       | 0.99              |
| Per risk allele |                                 | 1.96 (1.09-3.52)          | 0.02                | 2.15 (1.18-3.92)        | 0.01              |                                    | 1.18 (0.62-2.24)          | 0.62                | 1.32 (0.68-25.54)       | 0.41              |
| rs3781093       |                                 |                           |                     |                         |                   |                                    |                           |                     |                         |                   |
| AA              | 34/145                          | 1.00                      |                     | 1.00                    |                   | 35/156                             | 1.00                      |                     | 1.00                    |                   |
| GA              | 15/71                           | 0.83 (0.45-1.52)          | 0.54                | 0.81 (0.44-1.50)        | 0.51              | 23/60                              | 1.97 (1.16-3.33)          | 0.01                | 1.68 (0.99-2.86)        | 0.06              |
| GG              | 1/2                             | 2.95 (0.40-21.71)         | 0.29                | 2.10 (0.28-15.87)       | 0.47              | 3/5                                | 2.40 (0.74-7.82)          | 0.15                | 2.49 (0.73-8.44)        | 0.14              |
| Per risk allele |                                 | 0.91 (0.52-1.61)          | 0.75                | 0.88 (0.50-1.56)        | 0.66              |                                    | 1.76 (1.17-2.64)          | 0.007               | 1.64 (1.06-2.51)        | 0.03              |



|                 |        |                   |              |                   |       |        |                  |       |                  |      |
|-----------------|--------|-------------------|--------------|-------------------|-------|--------|------------------|-------|------------------|------|
| rs3802604       |        |                   |              |                   |       |        |                  |       |                  |      |
| AA              | 14/78  | 1.00              |              | 1.00              |       | 17/85  | 1.00             |       | 1.00             |      |
| GA              | 19/105 | 0.99 (0.50-1.99)  | 0.99         | 1.09 (0.54-2.20)  | 0.82  | 31/100 | 1.62 (0.90-2.93) | 0.11  | 1.56 (0.86-2.81) | 0.14 |
| GG              | 17/35  | 2.90 (1.43-5.89)  | 0.003        | 2.66 (1.31-5.43)  | 0.007 | 13/35  | 1.97 (0.95-4.05) | 0.07  | 2.23 (1.08-4.60) | 0.03 |
| Per risk allele |        | 1.76 (1.19-2.61)  | 0.005        | 1.66 (1.13-2.44)  | 0.009 |        | 1.42 (1.00-2.00) | 0.05  | 1.50 (1.05-2.14) | 0.03 |
| rs3824662       |        |                   |              |                   |       |        |                  |       |                  |      |
| CC              | 32/141 | 1.00              |              | 1.00              |       | 34/151 | 1.00             |       | 1.00             |      |
| AC              | 17/74  | 0.97 (0.54-1.75)  | 0.92         | 0.93 (0.51-1.68)  | 0.81  | 22/60  | 1.93 (1.13-3.29) | 0.02  | 1.65 (0.96-2.85) | 0.07 |
| AA              | 1/3    | 1.79 (0.24-13.11) | 0.57         | 1.90 (0.26-14.19) | 0.53  | 5/10   | 2.38 (0.93-6.08) | 0.07  | 2.23 (0.85-5.81) | 0.1  |
| Per risk allele |        | 1.01 (0.59-1.74)  | 0.96         | 0.98 (0.56-1.70)  | 0.93  |        | 1.68 (1.15-2.44) | 0.007 | 1.55 (1.05-2.30) | 0.03 |
| rs568727        |        |                   |              |                   |       |        |                  |       |                  |      |
| CC              | 13/76  | 1.00              |              | 1.00              |       | 14/82  | 1.00             |       | 1.00             |      |
| AC              | 19/105 | 1.07 (0.53-2.17)  | 0.85         | 1.02 (0.50-2.06)  | 0.96  | 33/99  | 2.29 (1.22-4.28) | 0.01  | 1.97 (1.05-3.71) | 0.04 |
| AA              | 18/37  | 3.24 (1.58-6.61)  | <b>0.001</b> | 2.89 (1.40-5.96)  | 0.004 | 14/40  | 2.30 (1.09-4.82) | 0.03  | 2.28 (1.08-4.80) | 0.03 |
| Per risk allele |        | 1.82 (1.23-2.69)  | 0.003        | 1.71 (1.15-2.54)  | 0.008 |        | 1.52 (1.08-2.12) | 0.02  | 1.51 (1.07-2.14) | 0.02 |
| rs3802600       |        |                   |              |                   |       |        |                  |       |                  |      |
| TT              | 29/132 | 1.00              |              | 1.00              |       | 34/149 | 1.00             |       | 1.00             |      |
| AT              | 19/81  | 1.02 (0.57-1.82)  | 0.95         | 0.90 (0.50-1.61)  | 0.72  | 22/58  | 1.99 (1.16-3.41) | 0.01  | 1.65 (0.95-2.85) | 0.07 |
| AA              | 1/3    | 3.51 (0.48-25.93) | 0.22         | 5.54 (0.56-54.32) | 0.14  | 5/14   | 1.52 (0.59-3.88) | 0.39  | 1.60 (0.62-4.13) | 0.33 |
| Per risk allele |        | 1.10 (0.63-1.89)  | 0.75         | 0.98 (0.56-1.72)  | 0.95  |        | 1.45 (1.01-2.07) | 0.04  | 1.39 (0.96-2.03) | 0.08 |
| rs528778        |        |                   |              |                   |       |        |                  |       |                  |      |
| GG              | 25/136 | 1.00              |              | 1.00              |       | 34/133 | 1.00             |       | 1.00             |      |
| AG              | 17/73  | 1.53 (0.84-2.78)  | 0.16         | 1.60 (0.87-2.91)  | 0.13  | 25/72  | 1.48 (0.88-2.48) | 0.14  | 1.45 (0.86-2.44) | 0.16 |
| AA              | 6/9    | 3.96 (1.62-9.69)  | 0.002        | 3.19 (1.30-7.82)  | 0.01  | 2/16   | 0.44 (0.11-1.85) | 0.26  | 0.56 (0.13-2.35) | 0.43 |
| Per risk allele |        | 1.79 (1.17-2.73)  | 0.007        | 1.70 (1.13-2.57)  | 0.01  |        | 1.02 (0.69-1.50) | 0.93  | 1.09 (0.73-1.62) | 0.69 |
| rs10905284      |        |                   |              |                   |       |        |                  |       |                  |      |
| AA              | 12/61  | 1.00              |              | 1.00              |       | 12/63  | 1.00             |       | 1.00             |      |
| CA              | 21/114 | 0.97 (0.48-1.97)  | 0.93         | 0.99 (0.49-2.03)  | 0.99  | 30/105 | 1.66 (0.85-3.25) | 0.14  | 1.56 (0.79-3.06) | 0.2  |
| CC              | 17/43  | 2.07 (0.99-4.33)  | 0.05         | 2.02 (0.96-4.25)  | 0.06  | 19/52  | 2.00 (0.97-4.11) | 0.06  | 2.04 (0.99-4.20) | 0.05 |

|                 |        |                   |              |                   |       |        |                  |      |                  |      |
|-----------------|--------|-------------------|--------------|-------------------|-------|--------|------------------|------|------------------|------|
| Per risk allele |        | 1.44 (0.97-2.15)  | 0.07         | 1.43 (0.96-2.11)  | 0.08  |        | 1.39 (0.99-1.96) | 0.06 | 1.41 (1.00-2.01) | 0.05 |
| rs434645        |        |                   |              |                   |       |        |                  |      |                  |      |
| GG              | 27/154 | 1.00              |              | 1.00              |       | 42/155 | 1.00             |      | 1.00             |      |
| AG              | 19/59  | 1.97 (1.10-3.55)  | 0.02         | 2.03 (1.12-3.67)  | 0.02  | 16/54  | 1.19 (0.67-2.12) | 0.56 | 1.35 (0.75-2.42) | 0.32 |
| AA              | 4/5    | 4.94 (1.72-14.18) | 0.003        | 3.92 (1.34-11.45) | 0.01  | 3/13   | 0.89 (0.27-2.86) | 0.84 | 1.15 (0.36-3.75) | 0.81 |
| Per risk allele |        | 2.08 (1.33-3.24)  | <b>0.001</b> | 1.99 (1.28-3.08)  | 0.002 |        | 1.05 (0.69-2.86) | 0.82 | 1.19 (0.78-1.83) | 0.42 |

---

**Supplemental Table 5. GATA3 SNPs and disease-free survival in the treated group by tamoxifen therapy**

| Genotype        | Tamoxifen Treated Group (n=220) |                           |                     |                         |                   | No Tamoxifen Treated Group (n=221) |                           |                     |                         |                   |
|-----------------|---------------------------------|---------------------------|---------------------|-------------------------|-------------------|------------------------------------|---------------------------|---------------------|-------------------------|-------------------|
|                 | # events/<br>patients           | Unadjusted HR<br>(95% CI) | Unadjusted <i>P</i> | Adjusted HR<br>(95% CI) | Adjusted <i>P</i> | # events/<br>patients              | Unadjusted HR<br>(95% CI) | Unadjusted <i>P</i> | Adjusted HR<br>(95% CI) | Adjusted <i>P</i> |
| rs1244186       |                                 |                           |                     |                         |                   |                                    |                           |                     |                         |                   |
| GG              | 34/121                          | 1.00                      |                     | 1.00                    |                   | 49/129                             | 1.00                      |                     | 1.00                    |                   |
| AG              | 26/81                           | 1.13 (0.68-1.89)          | 0.63                | 1.19 (0.72-2.00)        | 0.5               | 29/77                              | 1.09 (0.69-1.73)          | 0.72                | 1.14 (0.72-1.81)        | 0.59              |
| AA              | 10/16                           | 2.33 (1.15-4.71)          | 0.02                | 2.22 (1.09-4.54)        | 0.03              | 3/15                               | 0.51 (0.116-1.63)         | 0.26                | 0.60 (0.18-1.95)        | 0.4               |
| Per risk allele |                                 | 1.39 (0.98-1.97)          | 0.06                | 1.39 (0.99-1.96)        | 0.06              |                                    | 0.90 (0.63-1.29)          | 0.57                | 0.96 (0.67-1.39)        | 0.84              |
| rs2275806       |                                 |                           |                     |                         |                   |                                    |                           |                     |                         |                   |
| AA              | 17/59                           | 1.00                      |                     | 1.00                    |                   | 25/73                              | 1.00                      |                     | 1.00                    |                   |
| GA              | 25/104                          | 0.79 (0.42-1.46)          | 0.44                | 0.83 (0.44-1.56)        | 0.56              | 34/96                              | 1.07 (0.64-1.80)          | 0.79                | 1.10 (0.66-1.85)        | 0.71              |
| GG              | 27/54                           | 1.80 (0.98-3.30)          | 0.06                | 1.85 (1.01-3.39)        | 0.05              | 22/51                              | 1.43 (0.81-2.53)          | 0.22                | 1.50 (0.84-2.66)        | 0.17              |
| Per risk allele |                                 | 1.40 (1.01-1.96)          | 0.05                | 1.41 (1.01-1.95)        | 0.04              |                                    | 1.19 (0.89-1.60)          | 0.24                | 1.22 (0.91-1.64)        | 0.18              |
| rs369421        |                                 |                           |                     |                         |                   |                                    |                           |                     |                         |                   |
| AA              | 40/146                          | 1.00                      |                     | 1.00                    |                   | 57/153                             | 1.00                      |                     | 1.00                    |                   |
| GA              | 25/66                           | 1.48 (0.90-2.44)          | 0.13                | 1.54 (0.93-2.55)        | 0.1               | 22/59                              | 1.06 (0.65-1.74)          | 0.8                 | 1.07 (0.65-1.75)        | 0.79              |
| GG              | 5/6                             | 4.13 (1.62-10.53)         | 0.003               | 3.13 (1.19-8.20)        | 0.02              | 2/9                                | 0.50 (0.12-2.04)          | 0.33                | 0.63 (0.15-2.61)        | 0.52              |
| Per risk allele |                                 | 1.71 (1.15-2.55)          | 0.008               | 1.64 (1.11-2.41)        | 0.01              |                                    | 0.91 (0.61-1.35)          | 0.63                | 0.96 (0.64-1.44)        | 0.85              |
| rs2229359       |                                 |                           |                     |                         |                   |                                    |                           |                     |                         |                   |
| GG              | 54/186                          | 1.00                      |                     | 1.00                    |                   | 69/190                             | 1.00                      |                     | 1.00                    |                   |
| AG              | 16/31                           | 2.09 (1.20-3.66)          | 0.01                | 2.18 (1.24-3.84)        | 0.007             | 12/28                              | 1.14 (0.62-2.11)          | 0.68                | 1.19 (0.64-2.20)        | 0.59              |
| AA              | 0/1                             | -                         | 0.99                | -                       | 0.99              | 0/1                                | -                         | 0.99                | -                       | 0.99              |
| Per risk allele |                                 | 1.78 (1.06-2.98)          | 0.03                | 1.86 (1.10-3.15)        | 0.02              |                                    | 1.04 (0.58-1.86)          | 0.91                | 1.10 (0.61-1.99)        | 0.75              |
| rs3781093       |                                 |                           |                     |                         |                   |                                    |                           |                     |                         |                   |
| AA              | 46/145                          | 1.00                      |                     | 1.00                    |                   | 52/156                             | 1.00                      |                     | 1.00                    |                   |
| GA              | 23/71                           | 1.01 (0.61-1.66)          | 0.99                | 0.98 (0.59-1.62)        | 0.94              | 26/60                              | 1.50 (0.93-2.40)          | 0.09                | 1.36 (0.85-2.19)        | 0.2               |
| GG              | 1/2                             | 1.94 (0.27-14.11)         | 0.51                | 1.48 (0.20-10.96)       | 0.7               | 3/5                                | 1.74 (0.54-5.59)          | 0.35                | 2.03 (0.61-6.78)        | 0.25              |
| Per risk allele |                                 | 1.05 (0.65-1.68)          | 0.85                | 1.01 (0.63-1.61)        | 0.98              |                                    | 1.42 (0.97-2.08)          | 0.07                | 1.38 (0.93-2.06)        | 0.11              |

|                 |        |                   |               |                   |       |        |                  |      |                  |      |
|-----------------|--------|-------------------|---------------|-------------------|-------|--------|------------------|------|------------------|------|
| rs3802604       |        |                   |               |                   |       |        |                  |      |                  |      |
| AA              | 21/78  | 1.00              |               | 1.00              |       | 28/85  | 1.00             |      | 1.00             |      |
| GA              | 27/105 | 0.92 (0.52-1.63)  | 0.78          | 0.95 (0.53-1.70)  | 0.87  | 38/100 | 1.19 (0.73-1.93) | 0.49 | 1.16 (0.71-1.89) | 0.56 |
| GG              | 22/35  | 2.78 (1.53-5.06)  | <b>0.0008</b> | 2.59 (1.41-4.73)  | 0.002 | 15/35  | 1.39 (0.74-2.60) | 0.31 | 1.53 (0.81-2.87) | 0.19 |
| Per risk allele |        | 1.69 (1.20-2.38)  | 0.002         | 1.62 (1.16-2.26)  | 0.005 |        | 1.18 (0.87-1.60) | 0.29 | 1.22 (0.90-1.67) | 0.2  |
| rs3824662       |        |                   |               |                   |       |        |                  |      |                  |      |
| CC              | 45/141 | 1.00              |               | 1.00              |       | 48/151 | 1.00             |      | 1.00             |      |
| AC              | 24/74  | 1.02 (0.62-1.68)  | 0.93          | 0.99 (0.60-1.62)  | 0.95  | 27/60  | 1.63 (1.02-2.62) | 0.04 | 1.49 (0.92-2.41) | 0.1  |
| AA              | 1/3    | 1.12 (0.15-8.14)  | 0.91          | 1.10 (0.15-8.06)  | 0.92  | 6/10   | 2.11 (0.90-4.95) | 0.08 | 2.21 (0.93-5.26) | 0.07 |
| Per risk allele |        | 1.02 (0.65-1.62)  | 0.92          | 0.99 (0.62-1.57)  | 0.96  |        | 1.53 (1.09-2.14) | 0.01 | 1.49 (1.05-2.12) | 0.03 |
| rs568727        |        |                   |               |                   |       |        |                  |      |                  |      |
| CC              | 20/76  | 1.00              |               | 1.00              |       | 24/82  | 1.00             |      | 1.00             |      |
| AC              | 28/105 | 1.01 (0.57-1.80)  | 0.96          | 0.98 (0.55-1.74)  | 0.94  | 40/99  | 1.59 (0.96-2.64) | 0.07 | 1.43 (0.86-2.39) | 0.17 |
| AA              | 22/37  | 2.81 (1.53-5.15)  | <b>0.0009</b> | 2.60 (1.41-4.82)  | 0.002 | 17/40  | 1.63 (0.87-3.03) | 0.13 | 1.65 (0.88-3.07) | 0.12 |
| Per risk allele |        | 1.67 (1.19-2.34)  | 0.003         | 1.60 (1.14-2.24)  | 0.007 |        | 1.30 (0.97-1.74) | 0.08 | 1.29 (0.96-1.75) | 0.09 |
| rs3802600       |        |                   |               |                   |       |        |                  |      |                  |      |
| TT              | 40/132 | 1.00              |               | 1.00              |       | 48/149 | 1.00             |      | 1.00             |      |
| AT              | 28/81  | 1.15 (0.71-1.86)  | 0.58          | 1.07 (0.66-1.75)  | 0.78  | 27/58  | 1.74 (1.08-2.79) | 0.02 | 1.55 (0.96-2.50) | 0.07 |
| AA              | 1/3    | 2.05 (0.28-14.93) | 0.48          | 2.22 (0.27-18.07) | 0.46  | 6/14   | 1.32 (0.56-3.08) | 0.52 | 1.45 (0.61-3.42) | 0.4  |
| Per risk allele |        | 1.18 (0.74-1.85)  | 0.49          | 1.11 (0.70-1.76)  | 0.66  |        | 1.34 (0.97-1.84) | 0.08 | 1.33 (0.95-1.86) | 0.1  |
| rs528778        |        |                   |               |                   |       |        |                  |      |                  |      |
| GG              | 39/136 | 1.00              |               | 1.00              |       | 50/133 | 1.00             |      | 1.00             |      |
| AG              | 25/73  | 1.29 (0.78-2.13)  | 0.32          | 1.36 (0.82-2.26)  | 0.23  | 27/72  | 1.04 (0.65-1.66) | 0.87 | 1.01 (0.63-1.62) | 0.97 |
| AA              | 6/9    | 2.39 (1.01-5.66)  | 0.05          | 2.04 (0.86-4.86)  | 0.11  | 4/16   | 0.60 (0.22-1.66) | 0.33 | 0.69 (0.25-1.93) | 0.48 |
| Per risk allele |        | 1.42 (0.98-2.07)  | 0.06          | 1.40 (0.97-2.01)  | 0.07  |        | 0.90 (0.63-1.28) | 0.54 | 0.92 (0.64-1.32) | 0.65 |
| rs10905284      |        |                   |               |                   |       |        |                  |      |                  |      |
| AA              | 17/61  | 1.00              |               | 1.00              |       | 19/63  | 1.00             |      | 1.00             |      |
| CA              | 31/114 | 1.00 (0.56-1.81)  | 0.99          | 1.03 (0.57-1.88)  | 0.91  | 40/105 | 1.39 (0.80-2.40) | 0.24 | 1.32 (0.76-2.28) | 0.33 |
| CC              | 22/43  | 2.02 (1.07-3.80)  | 0.03          | 1.98 (1.05-3.75)  | 0.03  | 22/52  | 1.47 (0.80-2.72) | 0.22 | 1.49 (0.80-2.75) | 0.21 |

|                 |        |                  |       |                  |       |        |                  |      |                  |      |
|-----------------|--------|------------------|-------|------------------|-------|--------|------------------|------|------------------|------|
| Per risk allele |        | 1.43 (1.02-2.01) | 0.04  | 1.42 (1.01-1.98) | 0.04  |        | 1.21 (0.90-1.63) | 0.21 | 1.22 (0.90-1.64) | 0.2  |
| rs434645        |        |                  |       |                  |       |        |                  |      |                  |      |
| GG              | 41/154 | 1.00             |       | 1.00             |       | 59/155 | 1.00             |      | 1.00             |      |
| AG              | 25/59  | 1.76 (1.07-2.90) | 0.03  | 1.84 (1.11-3.04) | 0.02  | 18/54  | 0.91 (0.54-1.54) | 0.73 | 0.96 (0.57-1.65) | 0.89 |
| AA              | 4/5    | 3.15 (1.13-8.80) | 0.03  | 2.59 (0.91-7.39) | 0.07  | 4/12   | 0.88 (0.32-2.42) | 0.8  | 1.03 (0.37-2.85) | 0.96 |
| Per risk allele |        | 1.76 (1.19-2.60) | 0.004 | 1.72 (1.17-2.53) | 0.006 |        | 0.92 (0.63-1.36) | 0.69 | 0.99 (0.67-1.47) | 0.96 |

**Supplemental Table 6. GATA3 SNPs and breast cancer outcomes in the Pathways Study**

| SNP                                                           | A1/A2 | Overall Survival |      | Disease-Free Survival |      |
|---------------------------------------------------------------|-------|------------------|------|-----------------------|------|
|                                                               |       | HR (95% CI)      | P    | HR (95% CI)           | P    |
| <i>All patients (n=1,000)</i>                                 |       |                  |      |                       |      |
| rs1244186                                                     | T/C   | 0.87 (0.54-1.38) | 0.54 | 0.92 (0.68-1.25)      | 0.59 |
| rs2275806                                                     | G/A   | 0.89 (0.64-1.24) | 0.49 | 0.92 (0.73-1.17)      | 0.50 |
| rs369421                                                      | C/T   | 1 (0.59-1.67)    | 0.99 | 1.1 (0.78-1.54)       | 0.59 |
| rs2229359                                                     | T/C   | 1.23 (0.57-2.65) | 0.60 | 1.26 (0.75-2.11)      | 0.38 |
| rs3781093                                                     | G/A   | 0.86 (0.55-1.32) | 0.49 | 0.91 (0.67-1.22)      | 0.52 |
| rs3802604                                                     | C/T   | 0.87 (0.62-1.22) | 0.42 | 0.98 (0.77-1.24)      | 0.84 |
| rs3824662                                                     | T/G   | 0.95 (0.63-1.44) | 0.81 | 0.95 (0.71-1.27)      | 0.72 |
| rs568727                                                      | T/G   | 0.91 (0.63-1.3)  | 0.59 | 1.02 (0.8-1.32)       | 0.86 |
| rs3802600                                                     | A/T   | 1.07 (0.7-1.64)  | 0.76 | 1 (0.74-1.35)         | 0.98 |
| rs528778                                                      | T/C   | 0.95 (0.59-1.53) | 0.84 | 1.12 (0.82-1.54)      | 0.47 |
| rs10905284                                                    | C/A   | 0.92 (0.66-1.28) | 0.62 | 1.04 (0.82-1.31)      | 0.75 |
| rs434645                                                      | A/G   | 0.98 (0.6-1.6)   | 0.93 | 1.09 (0.78-1.53)      | 0.60 |
| <i>Patients treated with adjuvant chemotherapy (n=515)</i>    |       |                  |      |                       |      |
| rs1244186                                                     | T/C   | 0.78 (0.43-1.41) | 0.41 | 0.73 (0.48-1.13)      | 0.16 |
| rs2275806                                                     | G/A   | 0.96 (0.61-1.52) | 0.86 | 0.89 (0.64-1.25)      | 0.52 |
| rs369421                                                      | C/T   | 1.07 (0.58-1.99) | 0.82 | 0.95 (0.6-1.5)        | 0.83 |
| rs2229359                                                     | T/C   | 0.96 (0.35-2.66) | 0.94 | 1.16 (0.57-2.36)      | 0.68 |
| rs3781093                                                     | G/A   | 0.76 (0.41-1.4)  | 0.38 | 0.96 (0.64-1.44)      | 0.83 |
| rs3802604                                                     | C/T   | 0.92 (0.58-1.48) | 0.74 | 0.95 (0.68-1.34)      | 0.79 |
| rs3824662                                                     | T/G   | 0.84 (0.47-1.51) | 0.56 | 1.01 (0.68-1.5)       | 0.97 |
| rs568727                                                      | T/G   | 0.98 (0.6-1.62)  | 0.95 | 1.08 (0.75-1.54)      | 0.69 |
| rs3802600                                                     | A/T   | 1.02 (0.59-1.78) | 0.93 | 1.2 (0.81-1.77)       | 0.36 |
| rs528778                                                      | T/C   | 1.08 (0.61-1.91) | 0.79 | 0.95 (0.62-1.47)      | 0.82 |
| rs10905284                                                    | C/A   | 0.92 (0.58-1.44) | 0.71 | 1.04 (0.75-1.45)      | 0.80 |
| rs434645                                                      | A/G   | 1.21 (0.67-2.19) | 0.52 | 0.93 (0.58-1.49)      | 0.77 |
| <i>Patients nontreated with adjuvant chemotherapy (n=483)</i> |       |                  |      |                       |      |
| rs1244186                                                     | T/C   | 0.92 (0.43-1.97) | 0.83 | 1.14 (0.72-1.78)      | 0.58 |
| rs2275806                                                     | G/A   | 0.84 (0.51-1.39) | 0.51 | 0.92 (0.65-1.29)      | 0.63 |
| rs369421                                                      | C/T   | 0.73 (0.28-1.88) | 0.51 | 1.3 (0.78-2.16)       | 0.32 |
| rs2229359                                                     | T/C   | 1.38 (0.41-4.61) | 0.60 | 1.39 (0.65-2.96)      | 0.40 |
| rs3781093                                                     | G/A   | 1.03 (0.54-1.95) | 0.93 | 0.85 (0.54-1.31)      | 0.45 |
| rs3802604                                                     | C/T   | 0.79 (0.48-1.32) | 0.37 | 0.98 (0.7-1.38)       | 0.90 |
| rs3824662                                                     | T/G   | 1.16 (0.64-2.1)  | 0.63 | 0.86 (0.56-1.32)      | 0.48 |
| rs568727                                                      | T/G   | 0.78 (0.46-1.35) | 0.38 | 0.92 (0.64-1.32)      | 0.66 |
| rs3802600                                                     | A/T   | 1.05 (0.52-2.12) | 0.90 | 0.74 (0.46-1.21)      | 0.23 |
| rs528778                                                      | T/C   | 0.72 (0.32-1.67) | 0.45 | 1.34 (0.84-2.12)      | 0.22 |
| rs10905284                                                    | C/A   | 0.93 (0.58-1.5)  | 0.77 | 1.01 (0.72-1.42)      | 0.95 |

rs434645

A/G

0.65 (0.27-1.59)

0.35

1.31 (0.81-2.14)

0.27

---

**Supplemental Figure 1.** Schemas of the S8897 trial and the Pathways Study

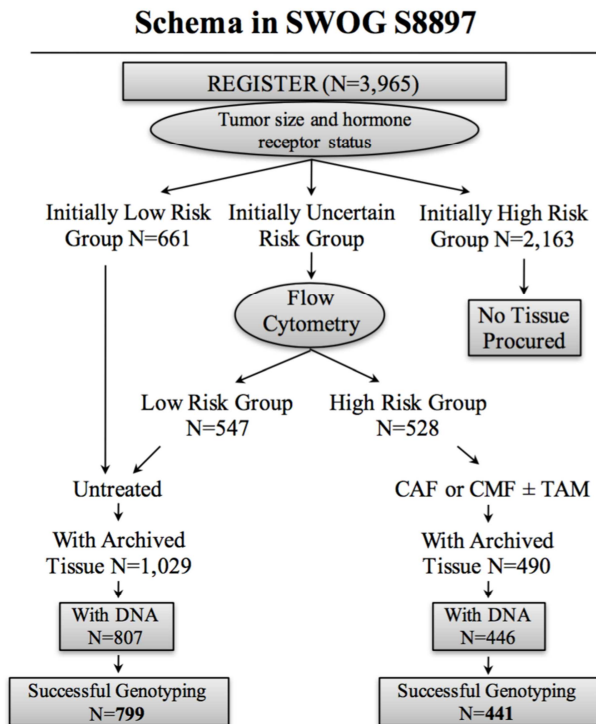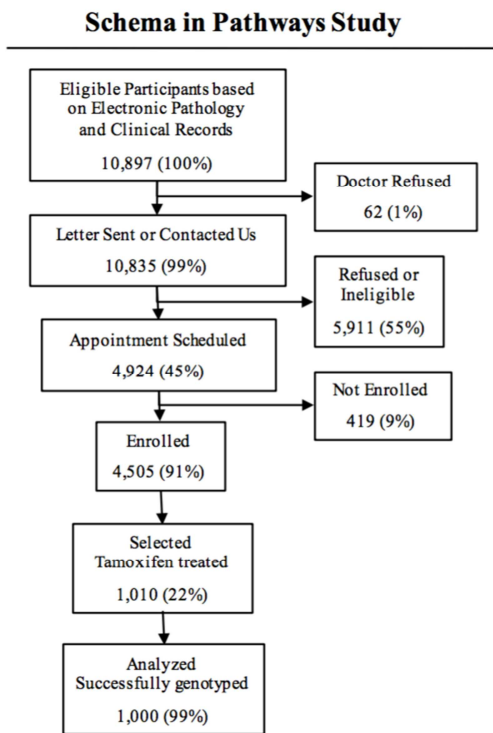



**Supplemental Figure 2.** Kaplan-Meier survival curves of disease-free survival by genotypes of the top two single nucleotide polymorphisms in *GATA3* in S8897 trial

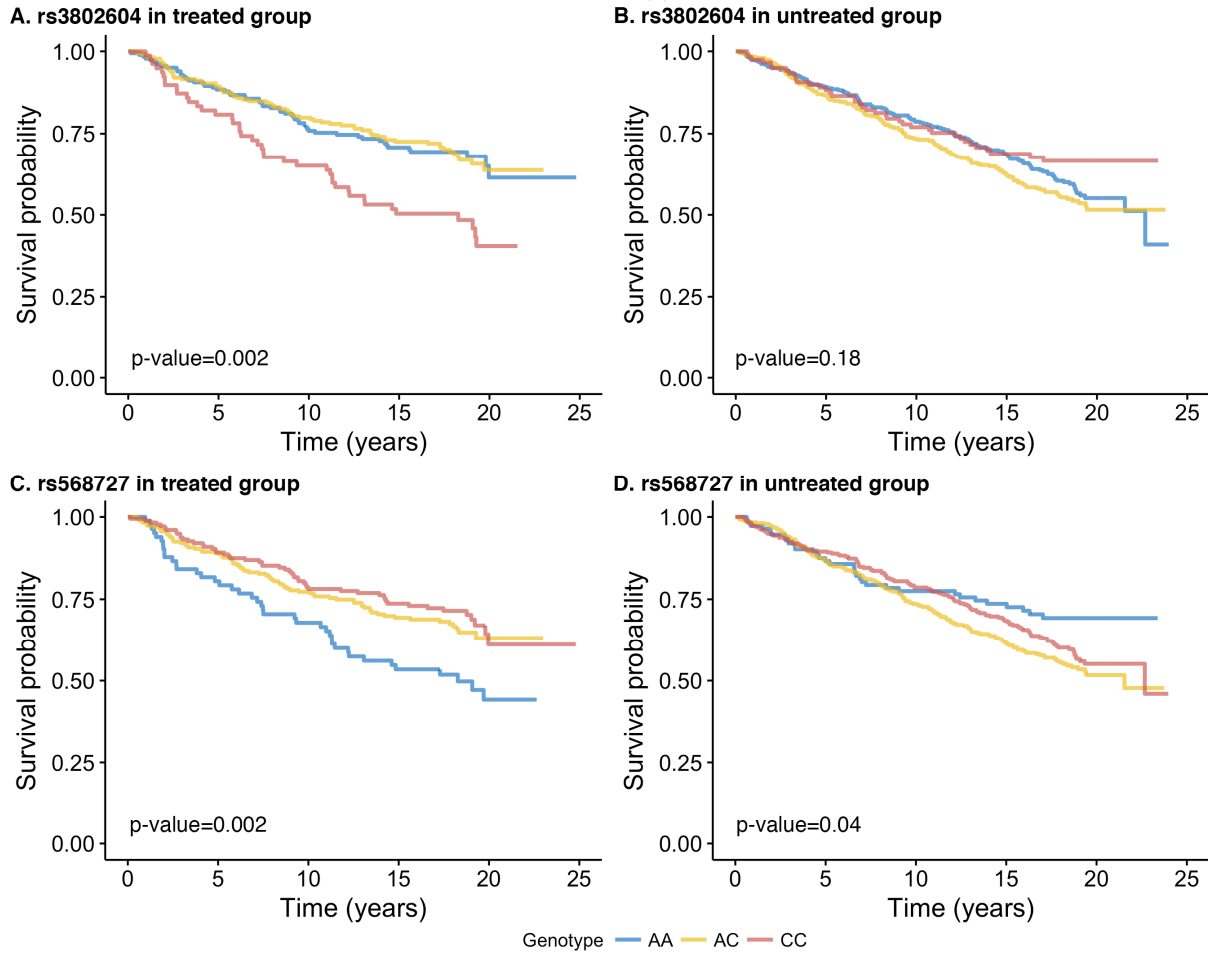

**Figure legend:** Kaplan-Meier curves of disease-free survival by the genotypes of rs3802604 and rs568727, the two single nucleotide polymorphisms in *GATA3* remained significant after correcting for multiple comparison, are plotted separately for the treated and untreated group in S8897 trial. P-values are from log-rank test.
